# Supplementary material
Source: Research Square preprint supplement (doi:10.21203/rs.3.rs-8088372/v1)
Supplement: Supplementary file 1 [file a081230f032cb2aae12d687d.docx]

Supplementary data 1

List of all potential drug-drug interactions

| No. | Drug-drug interactions | Frequency | Percentage | Risk rating |
| --- | --- | --- | --- | --- |
| 1. | Acetyl salicylic acid/Metformin | 246 | 61.5% | C |
| 2. | Glimepiride/Metformin | 162 | 40.5% | C |
| 3. | Glimepiride/ASA | 132 | 33.0% | C |
| 4. | Metformin/Enalapril | 113 | 28.3% | C |
| 5. | Enalapril/ASA | 97 | 24.3% | C |
| 6. | Insulin/Metformin | 82 | 20.5% | C |
| 7. | ASA/Furosemide | 82 | 20.5% | C |
| 8. | Metformin/Furosemide | 77 | 19.3% | C |
| 9. | Atorvastatin/Carbamazepine | 63 | 15.8% | D |
| 10. | Glimepiride/Enalapril | 58 | 14.5% | B |
| 11. | Insulin/Enalapril | 53 | 13.3% | B |
| 12. | Insulin/Furosemide | 49 | 12.3% | C |
| 13. | Alfacal/Calcium | 46 | 11.5% | C |
| 14. | Glimepiride/Ranitidine | 41 | 10.3% | C |
| 15. | ASA/Calcium | 41 | 10.3% | B |
| 16. | Clopidogrel/Atorvastatin | 39 | 9.8% | B |
| 17. | ASA/Clopidogrel | 37 | 9.3% | C |
| 18. | Insulin/Bisoprolol | 36 | 9.0% | C |
| 19. | Enalapril/Furosemide | 35 | 8.8% | C |
| 20. | Glimepiride/Furosemide | 35 | 8.8% | C |
| 21. | Metformin/Hydrochlorothiazide | 34 | 8.5% | C |
| 22. | Glimepiride/Bisoprolol | 34 | 8.5% | C |
| 23. | Amlodipine/Carbamazepine | 23 | 5.8% | D |
| 24. | Glimepiride/Insulin | 22 | 5.5% | C |
| 25. | Spironolactone/Atorvastatin | 20 | 5.0% | C |
| 26. | Bisoprolol/Carbamazepine | 20 | 5.0% | D |
| 27. | ASA/Spironolactone | 19 | 4.8% | A |
| 28. | Amlodipine/Calcium | 18 | 4.5% | C |
| 29. | Glimepiride/Calcium | 18 | 4.5% | B |
| 30. | Ranitidine/Calcium | 17 | 4.3% | B |
| 31. | Carbamazepine/Allopurinol | 14 | 3.5% | C |
| 32. | Glimepiride/Hydrochlorothiazide | 13 | 3.3% | C |
| 33. | Insulin/Hydrochlorothiazide | 12 | 3.0% | C |
| 34. | Vildagliptin/ASA | 12 | 3.0% | C |
| 35. | Glimepiride/Atenolol | 12 | 3.0% | C |
| 36. | Losartan/Carbamazepine | 12 | 3.0% | D |
| 37. | Insulin/Atenolol | 10 | 2.5% | C |
| 38. | Enalapril/Hydrochlorothiazide | 9 | 2.3% | C |
| 39. | Enalapril/Sitagliptin | 9 | 2.3% | C |
| 40. | Clopidogrel/Amlodipine | 9 | 2.3% | C |
| 41. | Digoxin/Atorvastatin | 9 | 2.3% | C |
| 42. | Digoxin/Furosemide | 9 | 2.3% | C |
| 43. | Calcium/Hydrochlorothiazide | 7 | 1.8% | C |
| 44. | Enalapril/Spironolactone | 6 | 1.5% | C |
| 45. | Metformin/Ramipril | 6 | 1.5% | C |
| 46. | Glibenclamide/Metformin | 6 | 1.5% | C |
| 47. | ASA/Indomethacin | 6 | 1.5% | D |
| 48. | Isosorbide dinitrate/Carbamazepine | 5 | 1.3% | D |
| 49. | Insulin/Cortisone | 5 | 1.3% | C |
| 50. | Levothyroxine/Calcium | 5 | 1.3% | D |
| 51. | Amiloride/ASA | 5 | 1.3% | A |
| 52. | ASA/Ramipril | 5 | 1.3% | C |
| 53. | Warfarin/Glimepiride | 5 | 1.3% | C |
| 54. | Glibenclamide/ASA | 5 | 1.3% | C |
| 55. | Glimepiride/Vildagliptin | 5 | 1.3% | D |
| 56. | Atenolol/Bisoprolol | 5 | 1.3% | C |
| 57. | Carbamazepine/Hydrochlorothiazide | 5 | 1.3% | C |
| 58. | Atorvastatin/Carvedilol | 5 | 1.3% | C |
| 59. | Digoxin/Bisoprolol | 5 | 1.3% | C |
| 60. | Indomethacin/Enalapril | 5 | 1.3% | C |
| 61. | Insulin/Vildagliptin | 4 | 1.0% | D |
| 62. | Insulin/Timolol | 4 | 1.0% | C |
| 63. | Salbutamol/Bisoprolol | 4 | 1.0% | C |
| 64. | Spironolactone/Losartan | 4 | 1.0% | C |
| 65. | Digoxin/Spironolactone | 4 | 1.0% | C |
| 66. | Amlodipine/Indomethacin | 4 | 1.0% | B |
| 67. | Furosemide/Budesonide | 3 | 0.8% | C |
| 68. | Atenolol/Calcium | 3 | 0.8% | B |
| 69. | Amlodipine/Diclofenac | 3 | 0.8% | B |
| 70. | ASA/Diclofenac | 3 | 0.8% | D |
| 71. | Bisoprolol/Diclofenac | 3 | 0.8% | C |
| 72. | Enalapril/Losartan | 3 | 0.8% | D |
| 73. | Enalapril/Candesartan | 3 | 0.8% | D |
| 74. | Enalapril/Amiloride | 3 | 0.8% | C |
| 75. | Clopidogrel/Omeprazole | 3 | 0.8% | D |
| 76. | Vildagliptin/Furosemide | 3 | 0.8% | C |
| 77. | Vildagliptin/Hydrochlorothiazide | 3 | 0.8% | C |
| 78. | Glibenclamide/Enalapril | 3 | 0.8% | B |
| 79. | Metformin/Cephalexin | 3 | 0.8% | C |
| 80. | Amitriptyline/Carbamazepine | 3 | 0.8% | C |
| 81. | Digoxin/Alfacalcidol | 3 | 0.8% | C |
| 82. | Indomethacin/Cortisone | 3 | 0.8% | C |
| 83. | Glimepiride/Indomethacin | 3 | 0.8% | B |
| 84. | Furosemide/Diclofenac | 2 | 0.5% | D |
| 85. | Iron/Ranitidine | 2 | 0.5% | C |
| 86. | Clopidogrel/Diclofenac | 2 | 0.5% | C |
| 87. | Enalapril/Vildagliptin | 2 | 0.5% | C |
| 88. | Enalapril/Enoxaparin | 2 | 0.5% | C |
| 89. | Bisoprolol/Timolol | 2 | 0.5% | C |
| 90. | Glimepiride/Timolol | 2 | 0.5% | C |
| 91. | Celecoxib/Enalapril | 2 | 0.5% | C |
| 92. | Insulin/Levofloxacin | 2 | 0.5% | C |
| 93. | Glimepiride/Sulphamethoxazole+Trimethoprim | 2 | 0.5% | C |
| 94. | Metformin/Sulphamethoxazole+Trimethoprim | 2 | 0.5% | C |
| 95. | Acetazolamide/ASA | 2 | 0.5% | D |
| 96. | Metformin/Acetazolamide | 2 | 0.5% | C |
| 97. | Atorvastatin/Esomeprazole | 2 | 0.5% | C |
| 98. | Amiodarone/Furosemide | 2 | 0.5% | C |
| 99. | Atorvastatin/Amiodarone | 2 | 0.5% | C |
| 100. | Bisoprolol/Amiodarone | 2 | 0.5% | C |
| 101. | Clopidogrel/Amiodarone | 2 | 0.5% | C |
| 102. | Acetaminophen/Carbamazepine | 2 | 0.5% | C |
| 103. | Ranitidine/Carvedilol | 2 | 0.5% | C |
| 104. | Glimepiride/Carvedilol | 2 | 0.5% | C |
| 105. | Insulin/Carvedilol | 2 | 0.5% | C |
| 106. | Digoxin/Carvedilol | 2 | 0.5% | C |
| 107. | Ibuprofen/Indomethacin | 2 | 0.5% | C |
| 108. | ASA/Ibuprofen | 2 | 0.5% | D |
| 109. | Ibuprofen/Cortisone | 2 | 0.5% | C |
| 110. | Bisoprolol/Alfuzosin | 1 | 0.3% | C |
| 111. | Atorvastatin/Esomeprazole | 1 | 0.3% | B |
| 112. | Salbutamol/Budesonide | 1 | 0.3% | B |
| 113. | Budesonide/Calcium | 1 | 0.3% | D |
| 114. | Diclofenac/Enalapril | 1 | 0.3% | C |
| 115. | Atenolol/Diclofenac | 1 | 0.3% | C |
| 116. | Timolol/Diclofenac | 1 | 0.3% | C |
| 117. | Diclofenac/Losartan | 1 | 0.3% | C |
| 118. | glimepiride/Diclofenac | 1 | 0.3% | B |
| 119. | Amiloride/Losartan | 1 | 0.3% | C |
| 120. | Amiloride/Candesartan | 1 | 0.3% | C |
| 121. | Clopidogrel/Pantoprazole | 1 | 0.3% | D |
| 122. | Clopidogrel/Esomeprazole | 1 | 0.3% | D |
| 123. | Spironolactone/Candesartan | 1 | 0.3% | C |
| 124. | Spironolactone/Ramipril | 1 | 0.3% | C |
| 125. | Furosemide/Ramipril | 1 | 0.3% | C |
| 126. | Glimepiride/Ramipril | 1 | 0.3% | B |
| 127. | Glimepiride/Glibenclamide | 1 | 0.3% | C |
| 128. | Glibenclamide/Atenolol | 1 | 0.3% | C |
| 129. | Glibenclamide/Ranitidine | 1 | 0.3% | C |
| 130. | Glibenclamide/Insulin | 1 | 0.3% | C |
| 131. | Glibenclamide/Indomethacin | 1 | 0.3% | B |
| 132. | Bisoprolol/Nifedipine | 1 | 0.3% | C |
| 133. | Clopidogrel/Nifedipine | 1 | 0.3% | C |
| 134. | Nifedipine/Calcium | 1 | 0.3% | C |
| 135. | Nifedipine/Doxazocin | 1 | 0.3% | C |
| 136. | Sacubitril/Enalapril | 1 | 0.3% | X |
| 137. | Sacubitril/Amlodipine | 1 | 0.3% | C |
| 138. | Sacubitril/Furosemide | 1 | 0.3% | C |
| 139. | Sacubitril/Valsartan | 1 | 0.3% | C |
| 140. | Atorvastatin/Sacubitril | 1 | 0.3% | B |
| 141. | Celecoxib/Indomethacin | 1 | 0.3% | X |
| 142. | Furosemide/Celecoxib | 1 | 0.3% | D |
| 143. | Enoxaparin/Celecoxib | 1 | 0.3% | C |
| 144. | Amlodipine/Celecoxib | 1 | 0.3% | B |
| 145. | Levofloxacin/Celecoxib | 1 | 0.3% | C |
| 146. | Levofloxacin/Calcium | 1 | 0.3% | D |
| 147. | Levofloxacin/Enalapril | 1 | 0.3% | B |
| 148. | Sulphamethoxazole+Trimethoprim/ASA | 1 | 0.3% | C |
| 149. | Hydrochlorothiazide/Hyoscine-N-Butylbromide | 1 | 0.3% | C |
| 150. | Pregabalin/Carbamazepine | 1 | 0.3% | C |
| 151. | Pregabalin/Enalapril | 1 | 0.3% | C |
| 152. | Alfacalcidol/Pregabalin | 1 | 0.3% | B |
| 153. | Enoxaparin/ASA | 1 | 0.3% | C |
| 154. | Amlodipine/Erythromycin | 1 | 0.3% | D |
| 155. | Atorvastatin/Erythromycin | 1 | 0.3% | C |
| 156. | Topiramate/ASA | 1 | 0.3% | D |
| 157. | Topiramate/Carbamazepine | 1 | 0.3% | D |
| 158. | Metformin/Topiramate | 1 | 0.3% | C |
| 159. | Topiramate/Furosemide | 1 | 0.3% | C |
| 160. | Acetazolamide/Topiramate | 1 | 0.3% | X |
| 161. | Carbamazepine/Acetazolamide | 1 | 0.3% | C |
| 162. | Acetazolamide/Dorzolamide | 1 | 0.3% | X |
| 163. | Glimepiride/Fluconazole | 1 | 0.3% | D |
| 164. | Amlodipine/Fluconazole | 1 | 0.3% | C |
| 165. | Atorvastatin/Fluconazole | 1 | 0.3% | C |
| 166. | Atorvastatin/Esomeprazole | 1 | 0.3% | C |
| 167. | Etoricoxib/Indomethacin | 1 | 0.3% | X |
| 168. | Etoricoxib/ASA | 1 | 0.3% | D |
| 169. | Etoricoxib/Carbamazepine | 1 | 0.3% | D |
| 170. | Etoricoxib/Enalapril | 1 | 0.3% | C |
| 171. | Etoricoxib/Hydrochlorothiazide | 1 | 0.3% | C |
| 172. | Etoricoxib/Candesartan | 1 | 0.3% | C |
| 173. | Repaglinide/ASA | 1 | 0.3% | C |
| 174. | Repaglinide/Atorvastatin | 1 | 0.3% | C |
| 175. | Repaglinide/Metformin | 1 | 0.3% | C |
| 176. | Hydrochlorothiazide/Chlorpheniramine | 1 | 0.3% | C |
| 178. | Mycophenolate/Omeprazole | 1 | 0.3% | C |
| 179. | Azithromycin/Amitriptyline | 1 | 0.3% | C |
| 180. | Atorvastatin/Esomeprazole | 1 | 0.3% | C |
| 181. | Insulin/Dapagliflozin | 1 | 0.3% | D |
| 182. | Dapagliflozin/ASA | 1 | 0.3% | C |
| 183. | Dapagliflozin/Enalapril | 1 | 0.3% | C |
| 184. | Amiodarone/Enalapril | 1 | 0.3% | C |
| 185. | Amiodarone/Spironolactone | 1 | 0.3% | C |
| 186. | Sitagliptin/Amiodarone | 1 | 0.3% | C |
| 187. | Ranitidine/Amiodarone | 1 | 0.3% | C |
| 188. | Betahistine/Loratadine | 1 | 0.3% | C |
| 189. | Carbamazepine/Loratadine | 1 | 0.3% | C |
| 190. | Loratadine/Promethazine | 1 | 0.3% | C |
| 191. | Clopidogrel/Lansoprazole | 1 | 0.3% | D |
| 192. | Levothyroxine/Omeprazole | 1 | 0.3% | B |
| 193. | Glimepiride/Propranolol | 1 | 0.3% | C |
| 194. | Glimepiride/Ofloxacin | 1 | 0.3% | C |
| 195. | Glimepiride/Medroxyprogesterone acetate | 1 | 0.3% | C |
| 196. | Atenolol/Timolol | 1 | 0.3% | C |
| 197. | Glimepiride/Amitriptyline | 1 | 0.3% | C |
| 198. | Baclofen/Amitriptyline | 1 | 0.3% | C |
| 199. | Indomethacin/Amitriptyline | 1 | 0.3% | C |
| 200. | Hydrochlorothiazide/Amitriptyline | 1 | 0.3% | C |
| 201. | ASA/Amitriptyline | 1 | 0.3% | C |
| 202. | Carbamazepine/Gabapentin | 1 | 0.3% | C |
| 203. | Carbamazepine/Theophylline | 1 | 0.3% | D |
| 204. | Methotrexate/Folic acid | 1 | 0.3% | A |
| 205. | Digoxin/Hydrochlorothiazide | 1 | 0.3% | C |
| 206. | Digoxin/Omeprazole | 1 | 0.3% | B |
| 207. | Digoxin/Calcium | 1 | 0.3% | C |
| 208. | Digoxin/Colchicine | 1 | 0.3% | C |
| 209. | Metformin/Triamcinolone | 1 | 0.3% | C |
| 210. | Triamcinolone/ASA | 1 | 0.3% | C |
| 211. | Indomethacin/Triamcinolone | 1 | 0.3% | C |
| 212. | Indomethacin/Losartan | 1 | 0.3% | C |
| 213. | Indomethacin/Candesartan | 1 | 0.3% | C |
| 214. | Indomethacin/Hydrochlorothiazide | 1 | 0.3% | C |
| 215. | Furosemide/Indomethacin | 1 | 0.3% | D |
| 216. | Glimepiride/Indomethacin | 1 | 0.3% | D |
| 217. | Bisoprolol/Indomethacin | 1 | 0.3% | C |
| 218. | Spironolactone/Indomethacin | 1 | 0.3% | C |
| 219. | Ibuprofen/Triamcinolone | 1 | 0.3% | C |
| 220. | Amlodipine/Ibuprofen | 1 | 0.3% | B |
| 221. | Bisoprolol/Ibuprofen | 1 | 0.3% | C |
| 222. | Clopidogrel/Ibuprofen | 1 | 0.3% | C |
| 223. | Ibuprofen/Ramipril | 1 | 0.3% | C |
| 224. | Atorvastatin/Esomeprazole | 1 | 0.3% | B |
| 225. | Nimesulide/ASA | 1 | 0.3% | D |
| 226. | Bisoprolol/Nimesulide | 1 | 0.3% | C |
| 227. | Nimesulide/Losartan | 1 | 0.3% | C |
| 228. | Amlodipine/Nimesulide | 1 | 0.3% | B |
